# Supplementary material for: Ongoing Outbreak of Extensively Drug-Resistant Campylobacter jejuni Infections Associated With US Pet Store Puppies, 2016-2020
Source: PubMed Central journal article supplement (PMC8444031; doi:10.1001/jamanetworkopen.2021.25203), 2021-09-15

## Supplementary Online Content

Francois Watkins LK, Laughlin ME, Joseph LA, et al. Ongoing outbreak of extensively drug-resistant *Campylobacter jejuni* infections associated with US pet store puppies, 2016-2020. *JAMA Netw Open*. 2021;4(9):e2125203. doi:10.1001/jamanetworkopen.2021.25203

**eTable.** Study Isolate Accession Numbers—National Center for Biotechnology and Information

**eFigure 1.** Surveillance and Investigation Timeline—United States, 1996-2020

**eFigure 2.** Traceback Schematic Showing Breeder and Distributor Information for 13 Puppies With an Epidemiologic or Laboratory Link to a Patient With Extensively Drug-Resistant *Campylobacter jejuni* Infection During Investigation 1 (January 2016-February 2018)

This supplementary material has been provided by the authors to give readers additional information about their work.

**eTable. Study isolate accession numbers – National Center for Biotechnology and Information**

| Strain       | Source | Year | BioSample    | Run        |
|--------------|--------|------|--------------|------------|
| 2013AY-0086  | Human  | 2013 | SAMN10834655 | SRR8497483 |
| 2013AY-1296  | Human  | 2013 | SAMN10834665 | SRR8497475 |
| 2013AY-1307  | Human  | 2013 | SAMN10834657 | SRR8497481 |
| 2014AY-0117  | Human  | 2014 | SAMN08098209 | SRR6354024 |
| 2014AY-0122  | Human  | 2014 | SAMN08098208 | SRR6354033 |
| 2015AY-0446  | Human  | 2015 | SAMN08098200 | SRR6354030 |
| 2015AY-0648  | Human  | 2015 | SAMN08098206 | SRR6354035 |
| 2015AY-1130  | Human  | 2015 | SAMN08098202 | SRR6354020 |
| 2015AY-1290  | Human  | 2015 | SAMN08098205 | SRR6354025 |
| 2016AY-0371  | Human  | 2016 | SAMN08098203 | SRR6354019 |
| 2016AY-1256  | Human  | 2016 | SAMN08098204 | SRR6354026 |
| 2017D-0132   | Human  | 2017 | SAMN07615386 | SRR6014503 |
| 2017d-0136   | Animal | 2017 | SAMN07504897 | SRR6171584 |
| 2017d-0138   | Animal | 2017 | SAMN07504895 | SRR6171584 |
| 2017d-0139   | Animal | 2017 | SAMN07504896 | SRR6171587 |
| 2017d-0140   | Animal | 2017 | SAMN07504898 | SRR6171583 |
| 2017d-0163   | Animal | 2017 | SAMN07674670 | SRR6171585 |
| 2017d-0180   | Human  | 2017 | SAMN07605519 | SRR6202903 |
| Cfsan069649  | Animal | 2017 | SAMN07710399 | SRS2544236 |
| Cfsan070929  | Animal | 2017 | SAMN07823471 | SRS2631803 |
| Cfsan071607  | Animal | 2017 | SAMN08025804 | SRS2693135 |
| Cfsan076605  | Animal | 2018 | SAMN08624512 | SRS3025548 |
| Cfsan076607  | Animal | 2018 | SAMN08624510 | SRS3025470 |
| Cfsan076609  | Animal | 2018 | SAMN08624509 | SRS3025489 |
| Cfsan076610  | Animal | 2018 | SAMN08624507 | SRS3025562 |
| PNUSAC000248 | Human  | 2015 | SAMN04429779 | SRR3145090 |
| PNUSAC000260 | Human  | 2016 | SAMN05255136 | SRR3710100 |
| PNUSAC000392 | Human  | 2016 | SAMN04961829 | SRR3492163 |
| PNUSAC000643 | Human  | 2016 | SAMN05413992 | SRR3932384 |
| PNUSAC000826 | Human  | 2016 | SAMN05791954 | SRR4280286 |
| PNUSAC000901 | Human  | 2016 | SAMN05804544 | SRR5017006 |
| PNUSAC000960 | Human  | 2016 | SAMN05908962 | SRR4427165 |
| PNUSAC001027 | Human  | 2016 | SAMN06007277 | SRR5060317 |
| PNUSAC001091 | Human  | 2016 | SAMN06036245 | SRR5039804 |
| PNUSAC001449 | Human  | 2016 | SAMN06562215 | SRR5337178 |
| PNUSAC001462 | Human  | 2016 | SAMN06285341 | SRR5230136 |
| PNUSAC001641 | Human  | 2017 | SAMN06644938 | SRR5382106 |
| PNUSAC001644 | Human  | 2017 | SAMN06644941 | SRR5382101 |
| PNUSAC001816 | Human  | 2017 | SAMN06759833 | SRR5456705 |
| PNUSAC001817 | Human  | 2017 | SAMN06759834 | SRR5456706 |
| PNUSAC001821 | Human  | 2013 | SAMN06829855 | SRR5483502 |
| PNUSAC001822 | Human  | 2013 | SAMN06829856 | SRR5483503 |
| PNUSAC001823 | Animal | 2013 | SAMN06829857 | SRR5483512 |
| PNUSAC001842 | Human  | 2017 | SAMN07135004 | SRR5581839 |
| PNUSAC001921 | Human  | 2017 | SAMN07124712 | SRR5581935 |
| PNUSAC002384 | Human  | 2016 | SAMN07419407 | SRR5878362 |
| PNUSAC002416 | Human  | 2017 | SAMN07629386 | SRR6048525 |
| PNUSAC002510 | Human  | 2015 | SAMN07490848 | SRR5932396 |
| PNUSAC002518 | Human  | 2017 | SAMN07510042 | SRR5937910 |

| Strain       | Source | Year | BioSample    | Run        |
|--------------|--------|------|--------------|------------|
| PNUSAC002574 | Animal | 2017 | SAMN07504894 | SRR5935033 |
| PNUSAC002580 | Animal | 2017 | SAMN07504900 | SRR5935048 |
| PNUSAC002743 | Human  | 2017 | SAMN07646583 | SRR6048555 |
| PNUSAC002744 | Human  | 2017 | SAMN07646584 | SRR6048556 |
| PNUSAC002880 | Human  | 2017 | SAMN07761796 | SRR6152533 |
| PNUSAC002906 | Human  | 2017 | SAMN07790191 | SRR6179762 |
| PNUSAC002986 | Human  | 2011 | SAMN07811994 | SRR6202926 |
| PNUSAC003024 | Human  | 2016 | SAMN07837859 | SRR6232441 |
| PNUSAC003026 | Human  | 2016 | SAMN07837861 | SRR6232434 |
| PNUSAC003029 | Human  | 2017 | SAMN07837874 | SRR6232448 |
| PNUSAC003033 | Human  | 2017 | SAMN07837867 | SRR6232462 |
| PNUSAC003051 | Human  | 2016 | SAMN07837858 | SRR6232430 |
| PNUSAC003081 | Human  | 2017 | SAMN07988994 | SRR6313161 |
| PNUSAC003089 | Human  | 2016 | SAMN07977045 | SRR6261379 |
| PNUSAC003101 | Human  | 2011 | SAMN07967650 | SRR6252249 |
| PNUSAC003152 | Human  | 2017 | SAMN08014318 | SRR6289219 |
| PNUSAC003153 | Human  | 2017 | SAMN08014319 | SRR6289213 |
| PNUSAC003169 | Human  | 2017 | SAMN08016191 | SRR6289218 |
| PNUSAC003172 | Animal | 2017 | SAMN08016801 | SRR6289215 |
| PNUSAC003174 | Animal | 2017 | SAMN08016803 | SRR6289217 |
| PNUSAC003192 | Human  | 2014 | SAMN08050093 | SRR6315880 |
| PNUSAC003193 | Human  | 2014 | SAMN08050094 | SRR6315883 |
| PNUSAC003194 | Human  | 2015 | SAMN08050095 | SRR6315887 |
| PNUSAC003197 | Human  | 2017 | SAMN08050098 | SRR6315881 |
| PNUSAC003208 | Animal | 2017 | SAMN08042328 | SRR6308365 |
| PNUSAC003215 | Human  | 2015 | SAMN08045651 | SRR6313024 |
| PNUSAC003228 | Human  | 2017 | SAMN08135041 | SRR6353935 |
| PNUSAC003265 | Human  | 2014 | SAMN08057557 | SRR6322616 |
| PNUSAC003268 | Human  | 2017 | SAMN08113727 | SRR6337383 |
| PNUSAC003286 | Human  | 2017 | SAMN08115708 | SRR6337362 |
| PNUSAC003292 | Human  | 2017 | SAMN08227096 | SRR6420461 |
| PNUSAC003324 | Animal | 2017 | SAMN08114841 | SRR6337349 |
| PNUSAC003325 | Human  | 2017 | SAMN08114840 | SRR6337345 |
| PNUSAC003399 | Human  | 2011 | SAMN08235481 | SRR6420455 |
| PNUSAC003404 | Human  | 2011 | SAMN08235483 | SRR6420452 |
| PNUSAC003405 | Human  | 2011 | SAMN08235484 | SRR6420457 |
| PNUSAC003450 | Human  | 2017 | SAMN08239965 | SRR6424104 |
| PNUSAC003513 | Animal | 2017 | SAMN08240012 | SRR6424098 |
| PNUSAC003525 | Human  | 2017 | SAMN08285080 | SRR6439804 |
| PNUSAC003663 | Human  | 2012 | SAMN08391248 | SRR6993873 |
| PNUSAC003734 | Human  | 2018 | SAMN08513612 | SRR6703680 |
| PNUSAC003751 | Human  | 2018 | SAMN08517333 | SRR6706106 |
| PNUSAC003753 | Human  | 2018 | SAMN08556545 | SRR6741489 |
| PNUSAC003754 | Animal | 2018 | SAMN08556540 | SRR6741488 |
| PNUSAC003758 | Human  | 2017 | SAMN08541473 | SRR6728403 |
| PNUSAC003810 | Human  | 2018 | SAMN08615568 | SRR6785781 |
| PNUSAC003814 | Human  | 2018 | SAMN08729633 | SRR6856517 |
| PNUSAC003829 | Human  | 2018 | SAMN08633868 | SRR6801479 |
| PNUSAC003858 | Human  | 2018 | SAMN08849554 | SRR6929981 |
| PNUSAC003859 | Human  | 2018 | SAMN08849550 | SRR6929982 |
| PNUSAC004151 | Human  | 2018 | SAMN08935219 | SRR7007280 |
| PNUSAC004161 | Human  | 2018 | SAMN08921938 | SRR6993877 |

| Strain       | Source | Year | BioSample    | Run         |
|--------------|--------|------|--------------|-------------|
| PNUSAC004172 | Human  | 2018 | SAMN08976119 | SRR7059394  |
| PNUSAC004180 | Human  | 2018 | SAMN08935226 | SRR7007273  |
| PNUSAC004262 | Human  | 2018 | SAMN09002344 | SRR7083212  |
| PNUSAC004265 | Human  | 2018 | SAMN09008081 | SRR7089338  |
| PNUSAC004272 | Human  | 2018 | SAMN09008083 | SRR7089365  |
| PNUSAC004317 | Human  | 2018 | SAMN09070521 | SRR7118963  |
| PNUSAC004406 | Human  | 2018 | SAMN09210563 | SRR7166319  |
| PNUSAC004536 | Human  | 2018 | SAMN09223455 | SRR7182410  |
| PNUSAC004639 | Human  | 2018 | SAMN09254485 | SRR7214227  |
| PNUSAC004666 | Human  | 2018 | SAMN09380202 | SRR7276867  |
| PNUSAC004860 | Human  | 2018 | SAMN09429079 | SRR7346454  |
| PNUSAC004937 | Human  | 2014 | SAMN09504230 | SRR7443911  |
| PNUSAC004938 | Human  | 2014 | SAMN09504228 | SRR7443905  |
| PNUSAC004939 | Human  | 2014 | SAMN09435849 | SRR7352584  |
| PNUSAC004940 | Human  | 2015 | SAMN09435850 | SRR7352588  |
| PNUSAC004941 | Human  | 2015 | SAMN09504229 | SRR7443915  |
| PNUSAC004943 | Human  | 2017 | SAMN09504228 | SRR7443905  |
| PNUSAC005127 | Human  | 2018 | SAMN09671544 | SRR7532444  |
| PNUSAC005130 | Human  | 2012 | SAMN09653823 | SRR7517840  |
| PNUSAC005131 | Human  | 2013 | SAMN09545624 | SRR7468590  |
| PNUSAC005140 | Human  | 2018 | SAMN09631646 | SRR7499439  |
| PNUSAC005157 | Human  | 2018 | SAMN09604156 | SRR7472643  |
| PNUSAC005242 | Human  | 2018 | SAMN09636742 | SRR7504911  |
| PNUSAC005415 | Human  | 2018 | SAMN09727298 | SRR7611019  |
| PNUSAC005961 | Human  | 2018 | SAMN09941072 | SRR7773444  |
| PNUSAC005985 | Human  | 2018 | SAMN09984769 | SRR7795433  |
| PNUSAC006307 | Human  | 2018 | SAMN10163374 | SRR7949763  |
| PNUSAC006398 | Human  | 2018 | SAMN10180455 | SRR7968377  |
| PNUSAC006544 | Human  | 2018 | SAMN10266281 | SRR8083469  |
| PNUSAC006552 | Human  | 2018 | SAMN10260430 | SRR8079775  |
| PNUSAC006606 | Human  | 2018 | SAMN10287185 | SRR8103790  |
| PNUSAC006677 | Human  | 2018 | SAMN10438495 | SRR8203994  |
| PNUSAC006764 | Human  | 2018 | SAMN10397952 | SRR8177998  |
| PNUSAC006805 | Human  | 2018 | SAMN10397946 | SRR8178042  |
| PNUSAC006816 | Human  | 2018 | SAMN10422374 | SRR8187086  |
| PNUSAC006852 | Human  | 2018 | SAMN10589348 | SRR8306535  |
| PNUSAC007371 | Human  | 2018 | SAMN10724952 | SRR8434313  |
| PNUSAC007381 | Human  | 2018 | SAMN10724943 | SRR8434305  |
| PNUSAC007628 | Human  | 2018 | SAMN10714797 | SRR8418787  |
| PNUSAC007978 | Human  | 2017 | SAMN10867884 | SRR8525870  |
| PNUSAC008091 | Human  | 2019 | SAMN11022492 | SRR8632918  |
| PNUSAC008467 | Human  | 2019 | SAMN11109455 | SRR8715354  |
| PNUSAC008765 | Human  | 2018 | SAMN16078535 | SRR12606552 |
| PNUSAC008851 | Human  | 2019 | SAMN11250476 | SRR8782863  |
| PNUSAC008908 | Human  | 2019 | SAMN11439804 | SRR8914616  |
| PNUSAC009087 | Human  | 2019 | SAMN11490887 | SRR8950402  |
| PNUSAC009268 | Human  | 2019 | SAMN14396413 | SRR11342509 |
| PNUSAC009270 | Human  | 2019 | SAMN11582981 | SRR9019622  |
| PNUSAC009357 | Human  | 2019 | SAMN14396415 | SRR11342510 |
| PNUSAC009606 | Human  | 2019 | SAMN14390643 | SRR11321380 |
| PNUSAC009659 | Human  | 2019 | SAMN14608373 | SRR11557474 |
| PNUSAC009690 | Human  | 2019 | SAMN14396414 | SRR11342520 |

| Strain       | Source | Year | BioSample    | Run         |
|--------------|--------|------|--------------|-------------|
| PNUSAC009836 | Human  | 2019 | SAMN12108601 | SRR9335747  |
| PNUSAC009838 | Human  | 2019 | SAMN12108597 | SRR9335745  |
| PNUSAC009898 | Human  | 2019 | SAMN12307459 | SRR9705411  |
| PNUSAC009948 | Human  | 2019 | SAMN12127688 | SRR9593495  |
| PNUSAC010116 | Human  | 2019 | SAMN12421851 | SRR9879560  |
| PNUSAC010326 | Human  | 2019 | SAMN12528564 | SRR9921270  |
| PNUSAC010799 | Human  | 2019 | SAMN12504884 | SRR9901717  |
| PNUSAC010840 | Human  | 2019 | SAMN12518212 | SRR9915954  |
| PNUSAC011331 | Human  | 2019 | SAMN12642726 | SRR10024862 |
| PNUSAC011593 | Human  | 2019 | SAMN12736016 | SRR10103059 |
| PNUSAC011649 | Human  | 2019 | SAMN12745436 | SRR10116195 |
| PNUSAC011680 | Human  | 2019 | SAMN12766991 | SRR10124058 |
| PNUSAC011781 | Human  | 2019 | SAMN12830807 | SRR10174197 |
| PNUSAC012595 | Human  | 2019 | SAMN13032462 | SRR10281749 |
| PNUSAC012739 | Human  | 2019 | SAMN13058937 | SRR10311572 |
| PNUSAC012750 | Human  | 2019 | SAMN13058811 | SRR10310359 |
| PNUSAC012858 | Human  | 2017 | SAMN13087375 | SRR10325876 |
| PNUSAC012931 | Human  | 2019 | SAMN13116031 | SRR10348600 |
| PNUSAC012960 | Human  | 2019 | SAMN13116628 | SRR10348703 |
| PNUSAC013773 | Human  | 2019 | SAMN13392908 | SRR10536684 |
| PNUSAC013845 | Human  | 2019 | SAMN13473218 | SRR10579508 |
| PNUSAC014266 | Human  | 2019 | SAMN13656684 | SRR10747831 |
| PNUSAC014287 | Human  | 2016 | SAMN13634673 | SRR10738420 |
| PNUSAC014505 | Human  | 2016 | SAMN13977250 | SRR11007825 |
| PNUSAC014526 | Human  | 2016 | SAMN14546233 | SRR11492192 |
| PNUSAC014574 | Human  | 2019 | SAMN13699046 | SRR10803555 |
| PNUSAC014904 | Human  | 2019 | SAMN14049758 | SRR11032272 |
| PNUSAC015167 | Human  | 2020 | SAMN13897151 | SRR10919697 |
| PNUSAC015390 | Human  | 2020 | SAMN13975226 | SRR11004666 |
| PNUSAC015391 | Human  | 2020 | SAMN13975217 | SRR11004664 |
| PNUSAC015415 | Human  | 2020 | SAMN13977299 | SRR11007929 |
| PNUSAC015699 | Human  | 2020 | SAMN14088458 | SRR11073224 |
| PNUSAC015725 | Animal | 2020 | SAMN14124791 | SRR11100741 |
| PNUSAC015726 | Human  | 2020 | SAMN14124790 | SRR11100742 |
| PNUSAC015802 | Animal | 2020 | SAMN14169401 | SRR11151282 |
| PNUSAC015969 | Human  | 2020 | SAMN14267089 | SRR11218506 |
| PNUSAC016044 | Human  | 2020 | SAMN14332977 | SRR11268064 |
| PNUSAC016106 | Human  | 2016 | SAMN14345131 | SRR11280624 |

**eFigure 1. Surveillance and investigation timeline—United States, 1996–2020**

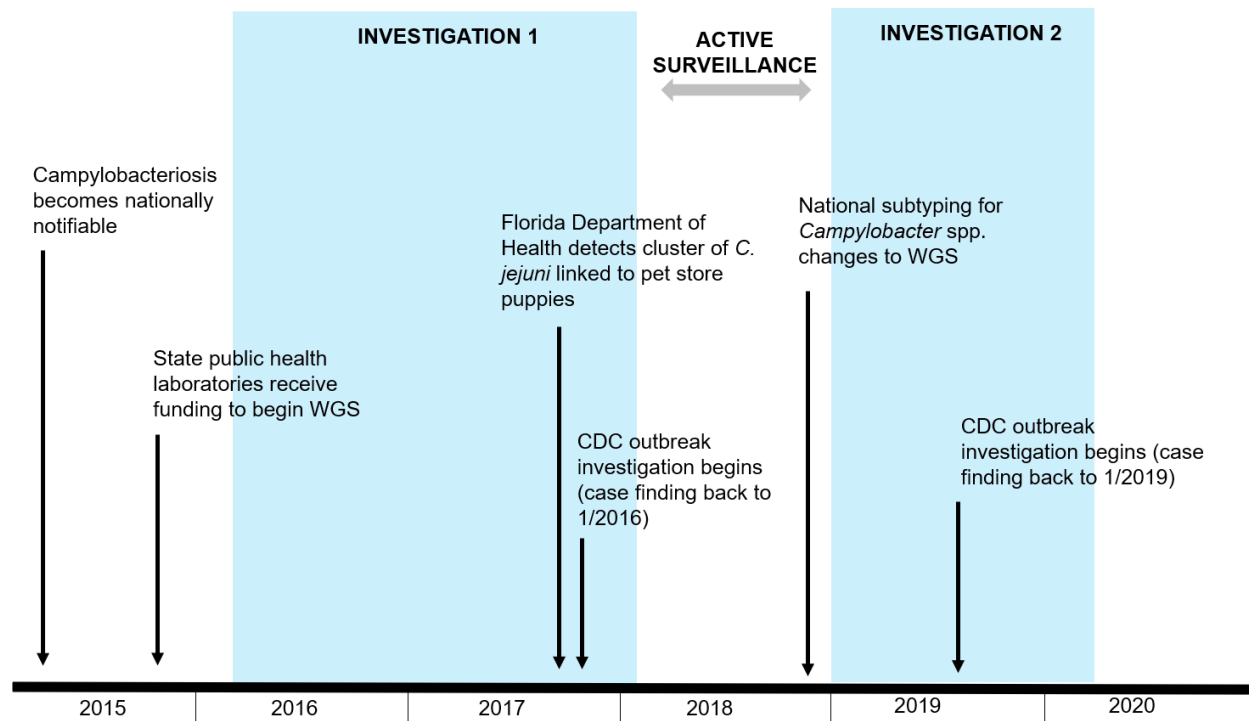

NARMS = National Antimicrobial Resistance Monitoring System; WGS = whole genome sequencing. Highlighted regions show the time periods of two multistate investigations for *Campylobacter jejuni* infections linked to pet store puppies.

Information about surveillance practices can provide a framework for understanding the public health response to extensively drug-resistant *Campylobacter jejuni* infections linked to pet store puppies.

Before 2015, national surveillance for campylobacteriosis was conducted through three primary systems established in 1996: PulseNet, FoodNet, and NARMS. PulseNet (<http://www.cdc.gov/pulsenet>) is the national laboratory network responsible for detecting outbreaks by linking cases of enteric bacteria disease based on subtyping information submitted from state public health laboratories. Initially, pulsed-field gel electrophoresis (PFGE) was the primary subtyping method used by PulseNet. Few states performed PFGE on *Campylobacter* isolates before the early 2000s when *Campylobacter*-specific protocols were developed; practices varied by state, with many performing PFGE on only a subset of isolates and some not at all. FoodNet (Foodborne Diseases Active Surveillance Network (<http://www.cdc.gov/foodnet>)), is a laboratory-based surveillance system comprising sites in 10 states that cover approximately 15% of the U.S. population. FoodNet collects demographics, epidemiologic information, and outcome data about patients with *Campylobacter* infection. Public health laboratories affiliated with FoodNet sites submit of *Campylobacter* isolates to CDC's NARMS laboratory (<http://www.cdc.gov/narms>) for antibiotic susceptibility testing using a frequency-based sampling scheme.

In 2015, campylobacteriosis became nationally notifiable, a change that prompted some health departments to improve their surveillance programs. The same year, state public health laboratories received funding to begin implementing WGS of enteric pathogens, and by October 2018, core genome multilocus sequence typing (cgMLST) based on WGS replaced PFGE as PulseNet's primary subtyping modality for *Campylobacter* spp. Some state laboratories also sequenced older isolates, making it possible to identify related strains from earlier times.

However, challenges to *Campylobacter* surveillance have persisted. The organism can be difficult to culture and requires trained laboratory personnel. The increased availability of culture-independent PCR-based tests during the 2010s has had a dramatic impact on diagnostic testing. Many clinical and public health laboratories are not equipped to perform reflex culture of positive PCR tests, so many *Campylobacter* diagnoses do not result in an isolate (required for assessing relatedness to an outbreak strain or susceptibility testing). Not all states require isolates be submitted to state public health laboratories, and reporting delays often result in isolates being discarded by clinical laboratories before public health officials are aware of the case. Furthermore, although WGS holds great promise for improving outbreak detection, the process is costly; many public health laboratories cannot sequence all isolates due to resource constraints.



**eFigure 2. Traceback schematic showing breeder and distributor information for 13 puppies with an epidemiologic or laboratory link to a patient with extensively drug-resistant *Campylobacter jejuni* infection during Investigation 1 (January 2016–February 2018)**

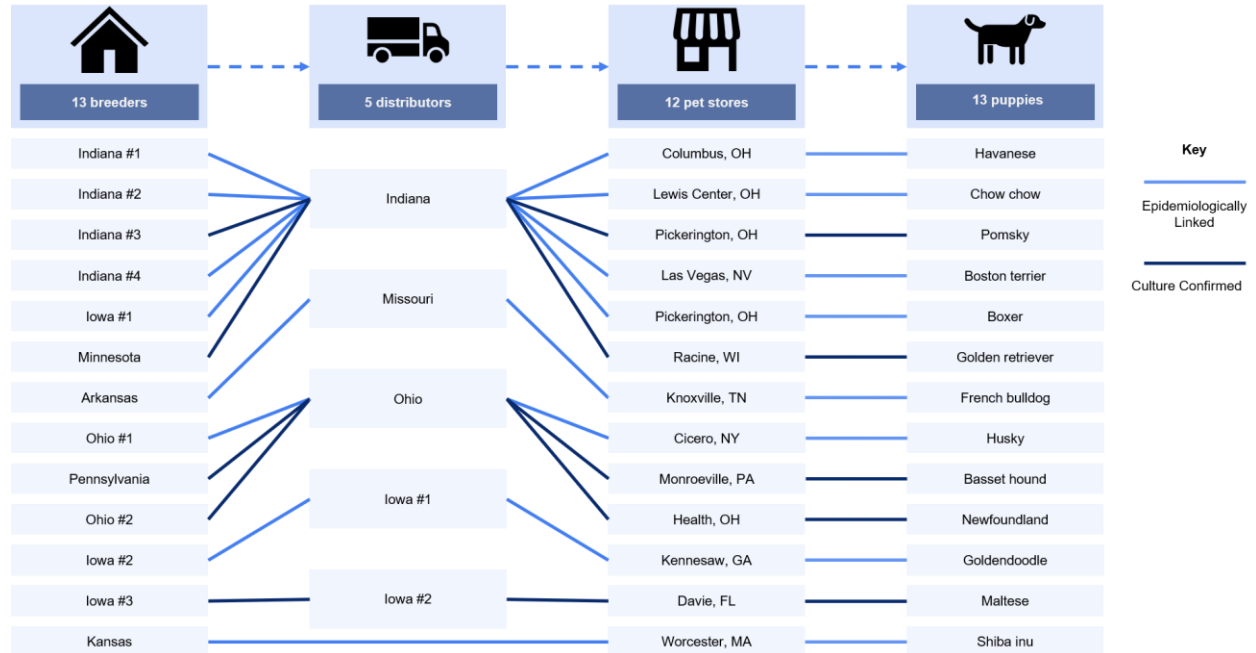

Supplement: jamanetwopen-e2125203-s001.pdf [file jamanetwopen-e2125203-s001.pdf]
